# Supplementary material for: Validation of the 2016 ASE/EACVI Guideline for Diastolic Dysfunction in Patients With Unexplained Dyspnea and a Preserved Left Ventricular Ejection Fraction
Source: PubMed Central journal article supplement — J Am Heart Assoc. 2021 Sep 3;10(18):e021165. doi: 10.1161/JAHA.121.021165 (PMC8649534; doi:10.1161/jaha.121.021165), 2021-09-03
Supplement: JAH3-10-e021165-s001.pdf [file JAH3-10-e021165-s001.pdf]

## **SUPPLEMENTAL MATERIAL**

**Table S1: Diagnoses of patients with PCWP<15mmHg**

| <b>Diagnoses</b>                                                              | <b>n=117</b> |
|-------------------------------------------------------------------------------|--------------|
| Chronic thrombo-embolic pulmonary disease, n (%)                              | 57 (49%)     |
| CTEPH, n (%)                                                                  | 55 (47%)     |
| CTED, n (%)                                                                   | 2 (2%)       |
| Masked HFpEF*                                                                 | 9 (8%)       |
| iPAH, n (%)                                                                   | 7 (6%)       |
| COPD, n (%)                                                                   | 6 (5%)       |
| PH with systemic disease (PH-group V)                                         | 5 (4%)       |
| PVOD                                                                          | 3 (3%)       |
| Other, n (%)<br>(e.g. Interstitial lung disease, NSIP, ILD, pulmonary cancer) | 8 (7%)       |
| <b>No cardiac or pulmonary disease</b>                                        |              |
| No pulmonary or cardiac diagnosis                                             | 18 (15%)     |
| Asymptomatic PH-gene carriers, n (%)                                          | 4 (3%)       |

\*Patients were labelled as masked-HFpEF (PCWP at rest <15mmHg but an abnormal increase in filling pressures during a diastolic stress test) based on; exercise RHC (n=5), positive fluid challenge (n=2), repeat RHC after 1 year (n=1), or consensus based on clinical parameters and follow-up without performing diastolic stress test (n=1). CTEPH, chronic thrombo-embolic pulmonary hypertension; CTED, chronic thrombo-embolic pulmonary disease (without PH); HFpEF, heart failure with preserved ejection fraction; iPAH, idiopathic pulmonary hypertension; COPD, chronic obstructive pulmonary disease; PH, pulmonary hypertension, PVOD, pulmonary veno-occlusive disease; NSIP, nonspecific interstitial pneumonia; ILD, interstitial lung disease.

**Table S2. Diagnostic properties of the H<sub>2</sub>FPEF-score (continuous vs. discrete)**

| <b>H<sub>2</sub>FPEF-score to diagnose patients with manifest-HFpEF</b> |                    |                    |            |            |
|-------------------------------------------------------------------------|--------------------|--------------------|------------|------------|
| <b>Diagnostic test (n=133)</b>                                          | <b>Sensitivity</b> | <b>Specificity</b> | <b>PPV</b> | <b>NPV</b> |
| <b>H<sub>2</sub>FPEF-score (discrete)</b>                               |                    |                    |            |            |
| ≥1 (n=132)                                                              | 100%               | 1%                 | 43%        | 100%       |
| ≥2 (n=121)                                                              | 96%                | 13%                | 45%        | 83%        |
| ≥3 (n=96)                                                               | 86%                | 38%                | 51%        | 78%        |
| ≥4 (n=66)                                                               | 63%                | 61%                | 55%        | 69%        |
| ≥5 (n=41)                                                               | 42%                | 78%                | 59%        | 64%        |
| ≥6 (n=30)                                                               | 33%                | 86%                | 63%        | 63%        |
| ≥7 (n=10)                                                               | 14%                | 97%                | 80%        | 60%        |
| ≥8 (n=5)                                                                | 7%                 | 99%                | 80%        | 59%        |
| ≥9 (n=3)                                                                | 4%                 | 99%                | 67%        | 58%        |
| <b>H<sub>2</sub>FPEF-score (continuous)</b>                             |                    |                    |            |            |
| ≥10% (n=132)                                                            | 100%               | 1%                 | 43%        | 100%       |
| ≥25% (n=122)                                                            | 96%                | 12%                | 45%        | 82%        |
| ≥50% (n=106)                                                            | 88%                | 26%                | 47%        | 74%        |
| ≥68% (n=83)                                                             | 74%                | 46%                | 51%        | 70%        |
| ≥90% (n=47)                                                             | 47%                | 74%                | 57%        | 65%        |
| ≥95% (n=22)                                                             | 25%                | 89%                | 64%        | 61%        |
| ≥99% (n=6)                                                              | 9%                 | 99%                | 83%        | 59%        |

HFpEF, heart failure with preserved ejection fraction; PPV, positive predictive value; NPV, negative predictive value.

**Figure S1. Flow chart of patient selection**

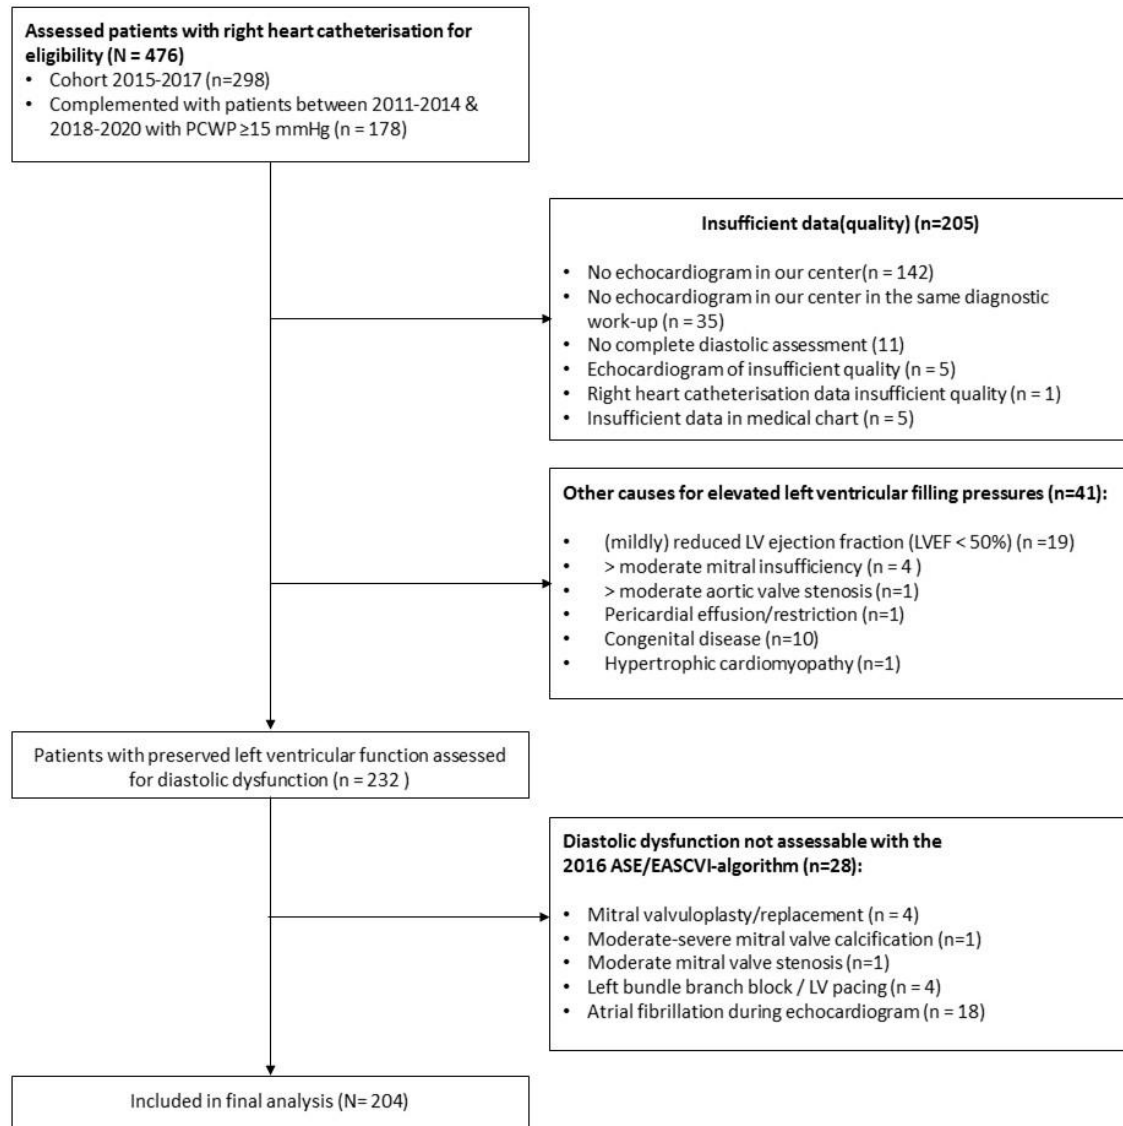

**Figure S2. Regression plots individual echo-parameters**

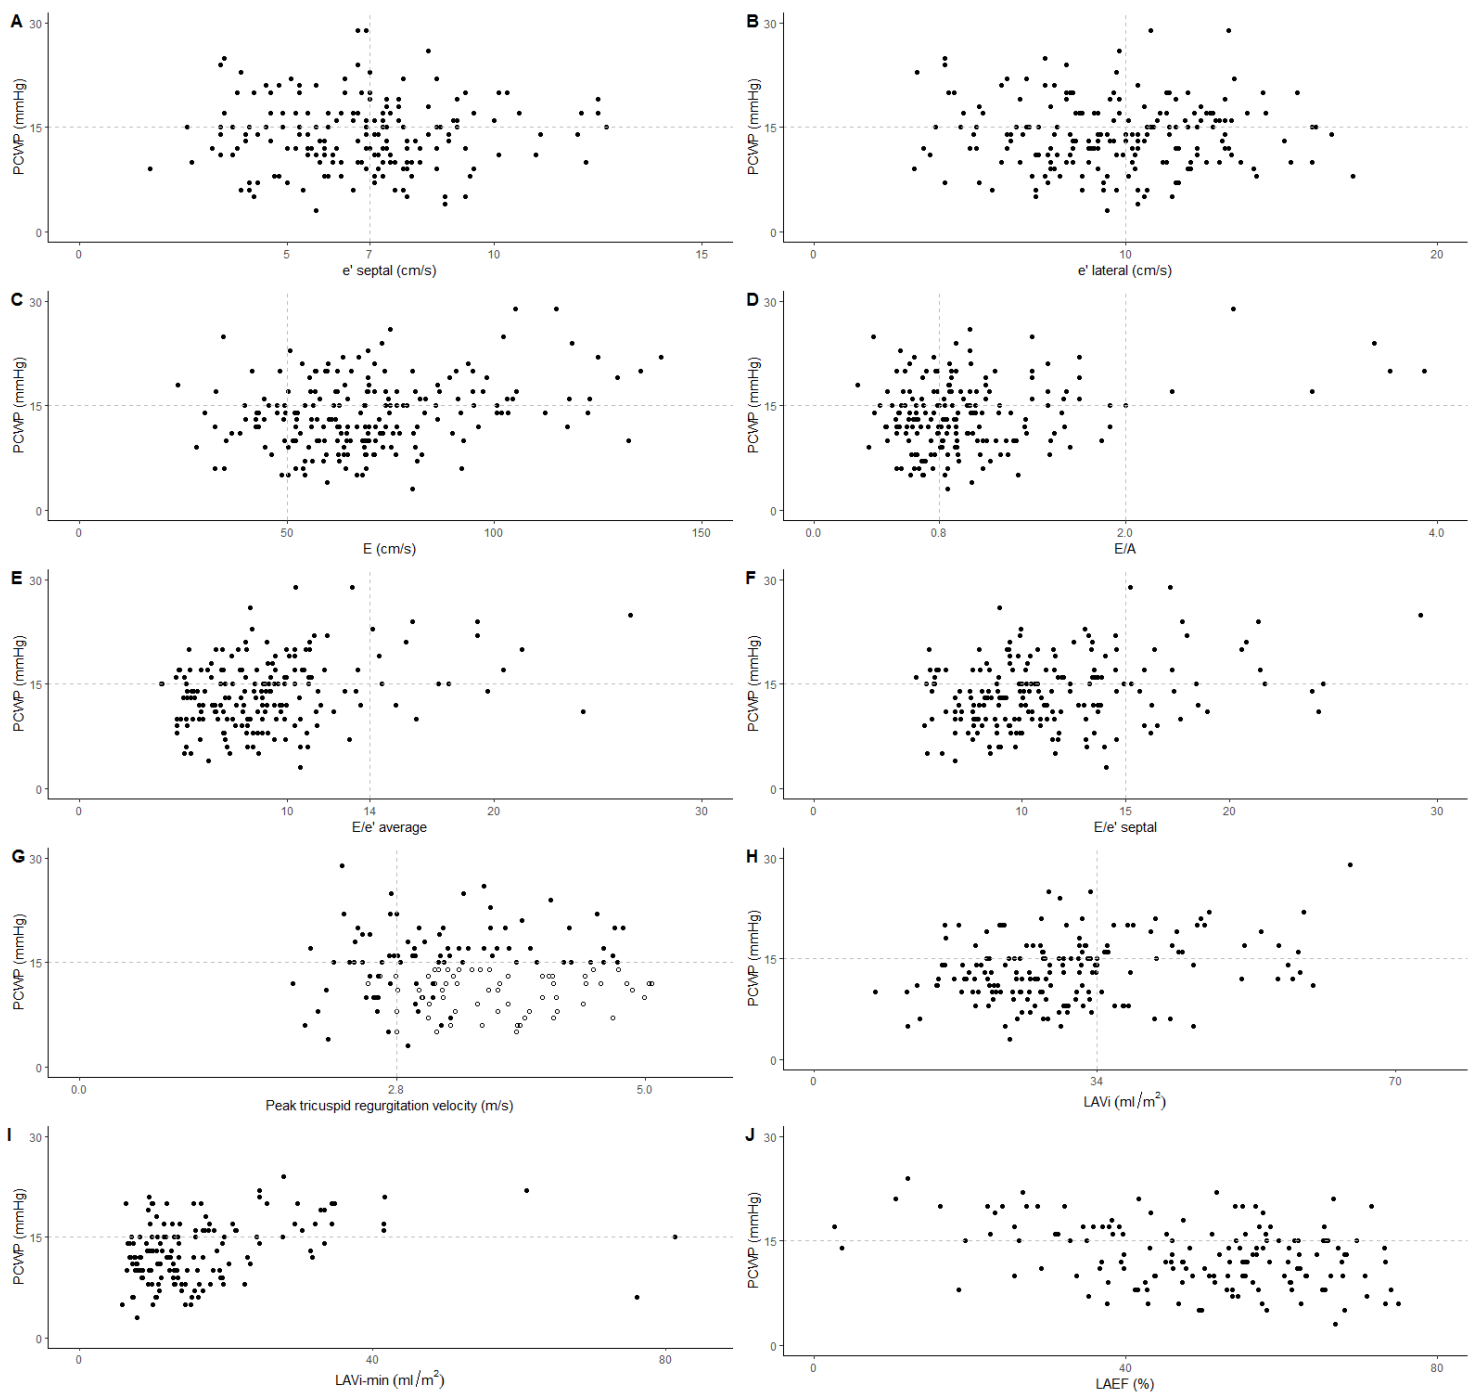

Regression plots are between PCWP and (A)  $e'$  septal; (B)  $e'$  lateral; (C) E; (D) E/A; (E) E/ $e'$  average; (F) E/ $e'$  septal; (G) peak tricuspid regurgitation velocity; (H) LAVi; (I) LAVi-min; and (J) LAEF. LAVi, indexed left atrial volume; LAVi-min, indexed minimal LA volume; LAEF, left atrial ejection fraction; PCWP, pulmonary capillary wedge pressure;

Figure S3. ROC-analysis of the discrete and continuous H<sub>2</sub>FPEF-score

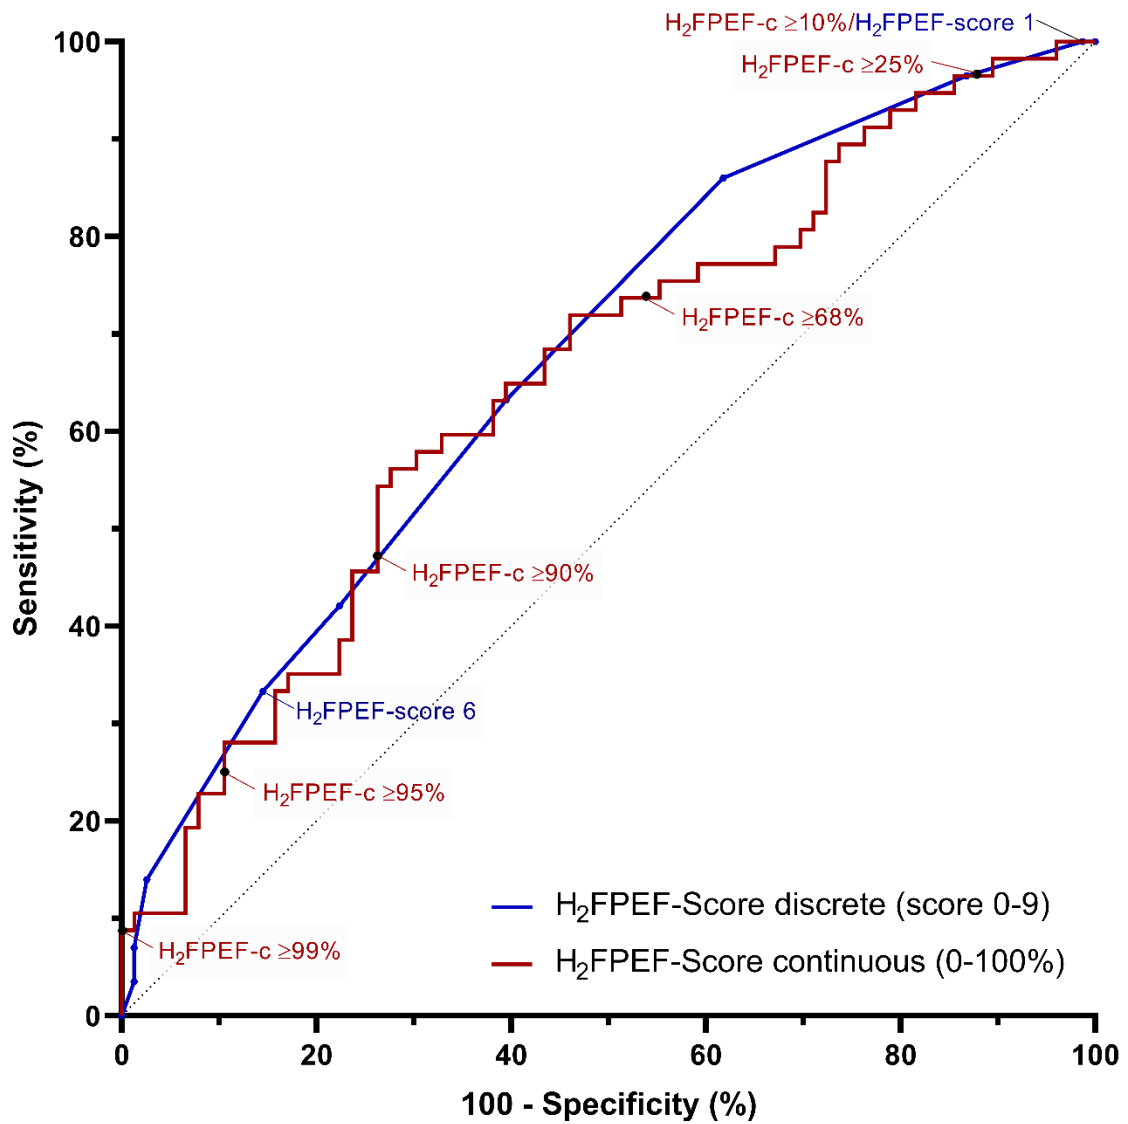

H<sub>2</sub>FPEF-c, H<sub>2</sub>FPEF-Score continuous.
